# Supplementary material for: Association of breast carcinoma growth with a non-canonical axis of IFNγ/IDO1/TSP1
Source: PubMed Central journal article supplement (PMC5689591; doi:10.18632/oncotarget.18781), 2017-06-28
Supplement: oncotarget-08-85024-s001.pdf [file oncotarget-08-85024-s001.pdf]

## Association of breast carcinoma growth with a non-canonical axis of IFN $\gamma$ /IDO1/TSP1

### SUPPLEMENTARY MATERIALS

Supplementary Table 1: The criteria for histologic grade of breast cancer

|         | Glandular/tubular structures | Nuclear pleomorphism                                                                 | Mitotic count (10 high power fields) |
|---------|------------------------------|--------------------------------------------------------------------------------------|--------------------------------------|
| Score 1 | >75%                         | Small nuclei, regular outline, uniform chromatin, little variant in cell size        | $\geq 7$ mitoses/                    |
| Score 2 | 10% to 75%                   | Open vesicular nuclei, visible nucleoli, moderate variability in both size and shape | 8-14 mitoses                         |
| Score 3 | <10%                         | Vesicular nuclei, prominent nucleoli, marked variation in size and shape             | $\geq 15$ mitoses                    |

**Grade 1:** scores of 3,4,5

**Grade 2:** scores of 6 or 7

**Grade 3:** scores of 8 or 9

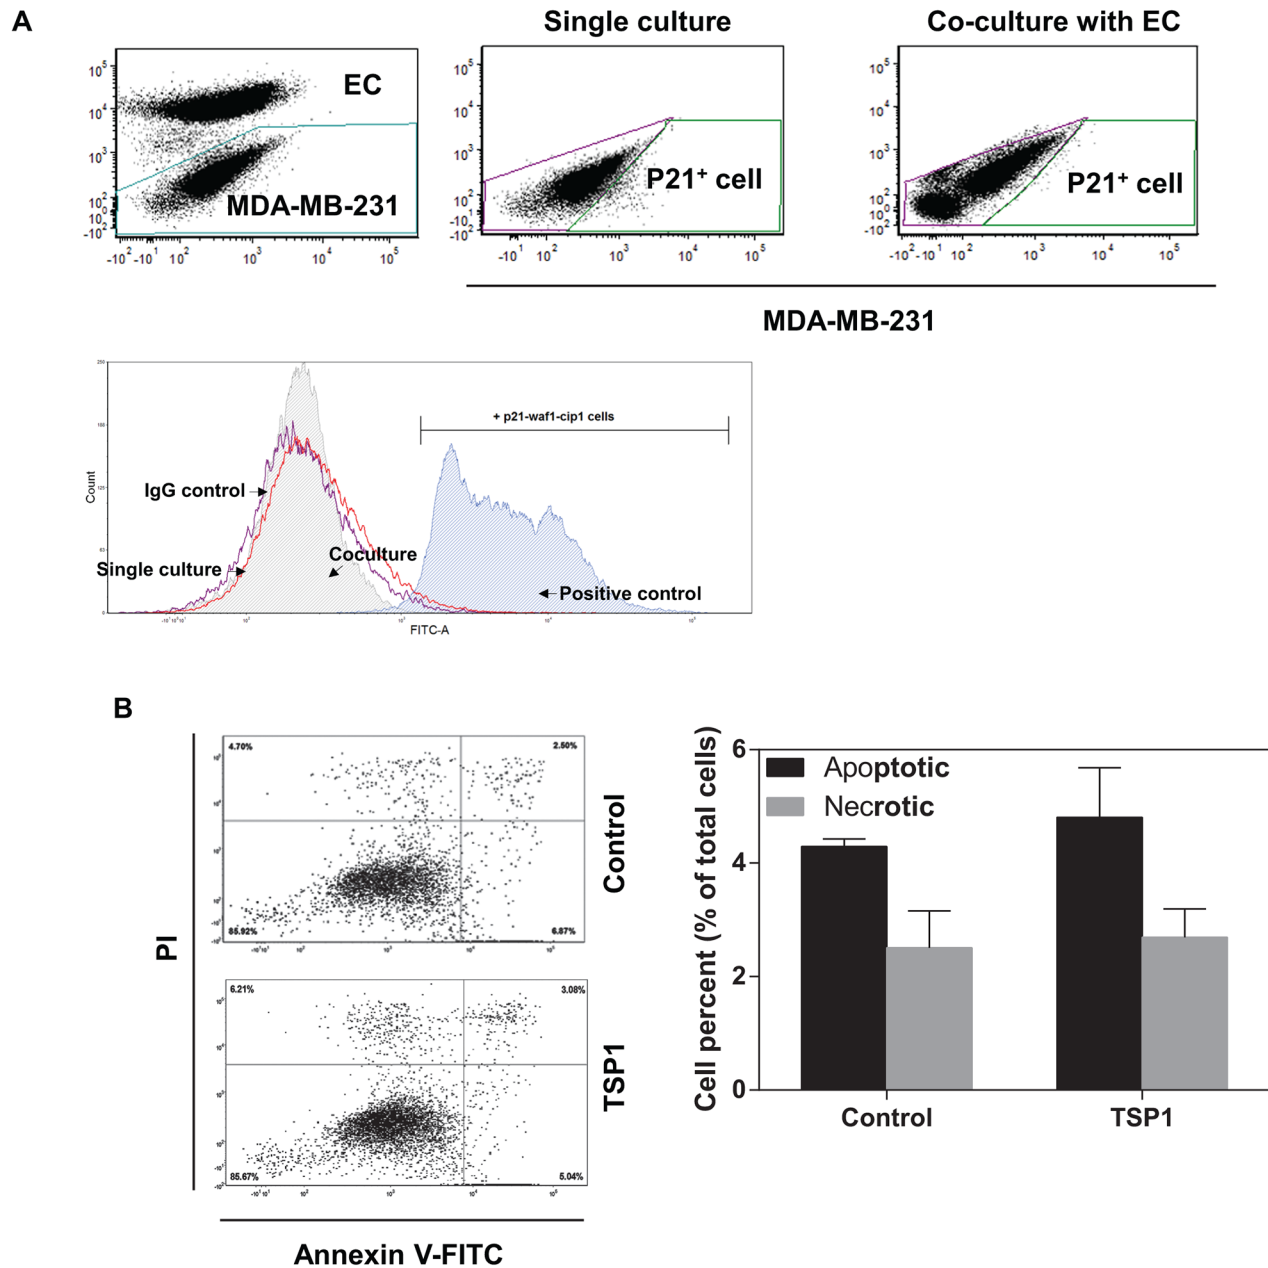

Supplementary Figure 1: (A) IDC cells and ECs were isolated from the co-culture through a cell sorting. (B) Apoptosis status of IDC cells treated with TSP1 was determined by flow cytometric analysis of Annexin-V/propidium expression.

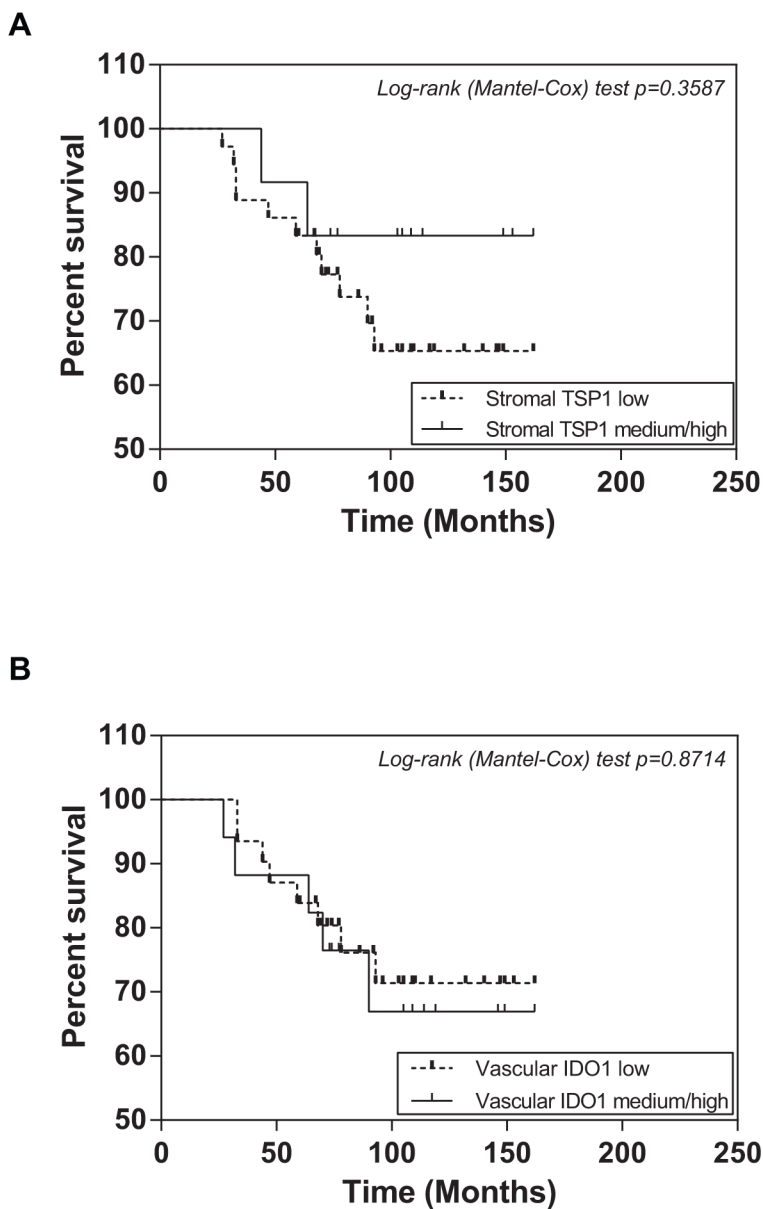

**Supplementary Figure 2: (A) Kaplan-Meier IDC patient’s survival curves stratified by two groups of histomorphometric scores of the stromal TSP1 ( $p=0.3587$ ). (B) Kaplan-Meier IDC patient’s survival curves stratified by two groups of histomorphometric scores the vascular IDO1 ( $p=0.8714$ ).**

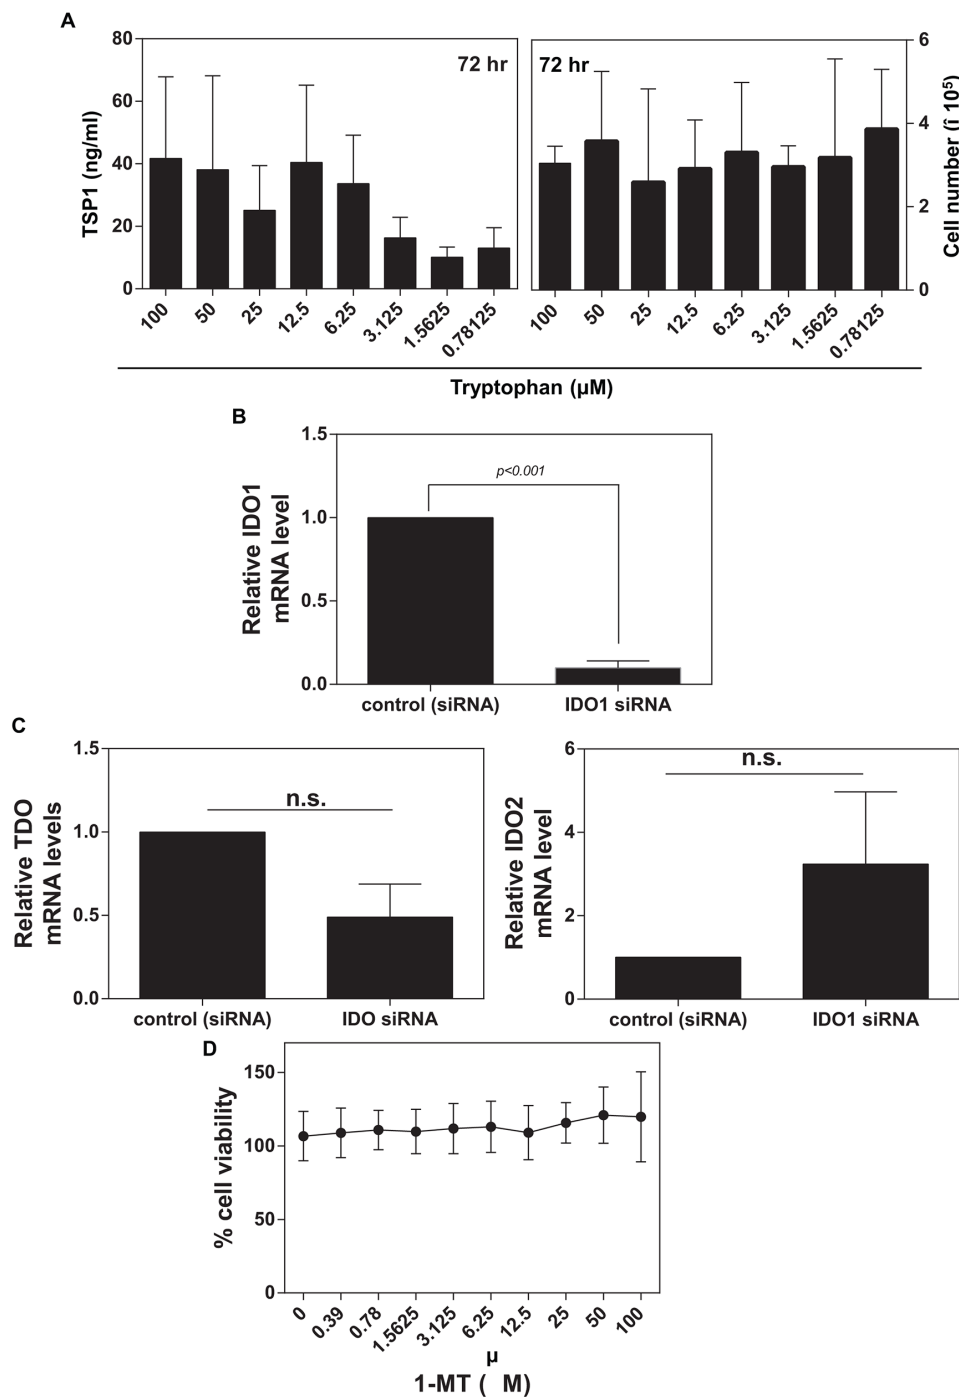

**Supplementary Figure 3: (A) TSP1 concentrations was determined by ELISA analysis, indicating that tryptophan concentrations affect TSP1 secretion by ECs. (B) ID1 siRNA significantly knockdowns IDO1 expression by ECs pre-treated with low glucose of MDA-MB-231 cell-conditioned medium. (C) The relative mRNAs of TDO and IDO2 was determined by QRT-PCR, showing that IDO1 knockdown did not cause detectable change in either of gene expression in ECs. (D) 1-methyl-tryptophan (1MT) does not change the cell viability up to 100  $\mu\text{M}$  concentration.**
